# Supplementary material
Source: PubMed Central journal article supplement (PMC7071886)
Supplement: pnas.1916944117.sapp.pdf [file pnas.1916944117.sapp.pdf]

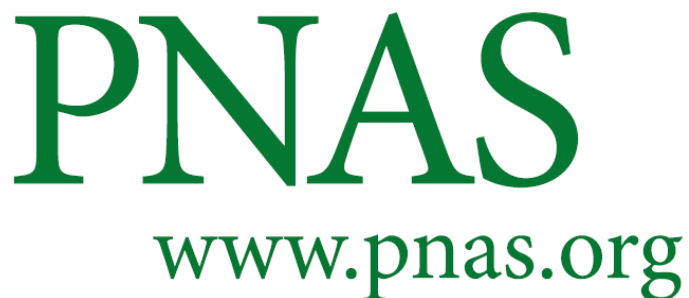

## Supplementary Information for

Mechanistic Approaches for Chemically Modifying the Coordination Sphere of Copper–Amyloid- $\beta$  Complexes

Jiyeon Han, Hyuck Jin Lee, Kyu Yeon Kim, Geewoo Nam, Junghyun Chae, and Mi Hee Lim\*

Email: [miheelim@kaist.ac.kr](mailto:miheelim@kaist.ac.kr)

### **This PDF file includes:**

Supplementary Materials and Methods  
Scheme S1  
Tables S1 to S3  
Figs. S1 to S27  
References for SI Reference Citations

## Supplementary Materials and Methods

**Preparation of L1.** 2-Thiophenecarboxaldehyde (0.098 mL, 1 mmol) was added into a solution of *N,N*-dimethyl-*p*-phenylenediamine (140 mg, 1 mmol) in EtOH (5 mL). After refluxing the solution for 1 h, the reaction mixture was cooled to room temperature. The solvent was removed under vacuum yielding an imine product (brown solid). Sodium borohydride (NaBH<sub>4</sub>; 230 mg, 6 mmol) was added into a solution of the imine product (230 mg, 1 mmol) in CH<sub>3</sub>OH (10 mL) at 0 °C. After 10 min, the reaction mixture was stirred at room temperature for 30 min. The reaction was quenched with H<sub>2</sub>O and extracted with CH<sub>2</sub>Cl<sub>2</sub> (3x). The combined organic phase was washed with brine (1x) and dried over anhydrous magnesium sulfate (MgSO<sub>4</sub>). The crude compound was purified by column chromatography (SiO<sub>2</sub>; EtOAc:hexanes = 1:3) yielding the product (130 mg, 54%; yellow solid). <sup>1</sup>H NMR [400 MHz, DMSO-*d*<sub>6</sub>, δ (ppm)]: 7.33 (1H, dd, *J* = 1.2 Hz, *J* = 5.0 Hz), 7.01 (1H, dq, *J* = 3.6 Hz), 6.95 (1H, dd, *J* = 3.6 Hz, *J* = 5.0 Hz), 6.62-6.59 (2H, m), 6.58-6.54 (2H, m), 5.60-5.57 (1H, m), 4.36 (2H, d, *J* = 5.6 Hz), 2.70 (6H, s). <sup>13</sup>C NMR [100 MHz, DMSO-*d*<sub>6</sub>, δ (ppm)]: 145.1, 143.2, 140.5, 126.6, 124.4, 124.2, 115.1, 113.8, 43.0, 41.7. HRMS (*m/z*): [M + H]<sup>+</sup> Calcd. for C<sub>13</sub>H<sub>17</sub>N<sub>2</sub>S: 233.1112, found: 233.1099.

**Preparation of L2.** 2-(Bromomethyl)thiophene (62 mg, 0.4 mmol) was added dropwise to a solution of potassium hydroxide (KOH; 33 mg, 0.6 mmol) and 4-(dimethylamino)benzenethiol (30 mg, 0.2 mmol) in DMF/H<sub>2</sub>O (2 mL/0.2 mL). The reaction mixture was stirred at room temperature for 24 h and then cooled to 0 °C. The reaction was quenched with H<sub>2</sub>O and extracted with EtOAc (4x). The combined organic layer was dried over anhydrous MgSO<sub>4</sub> and concentrated under vacuum. The crude compound was purified by column chromatography (SiO<sub>2</sub>; EtOAc:hexanes = 1:6) yielding the product (36 mg, 73%; yellow liquid). <sup>1</sup>H NMR [400 MHz, DMSO-*d*<sub>6</sub>, δ (ppm)]: 7.36 (1H, dd, *J* = 5.1 Hz, *J* = 1.3 Hz), 7.22-7.18 (2H, m), 6.88 (1H, dd, *J* = 5.1 Hz, *J* = 3.4 Hz), 6.82-6.81 (1H, m), 6.66-6.62 (2H, m), 4.21 (2H, d, *J* = 0.7 Hz), 2.80 (6H, s). <sup>13</sup>C NMR [100 MHz, CD<sub>3</sub>OD, δ (ppm)]: 150.5, 141.8, 134.4, 126.0, 125.7, 124.1, 120.1, 112.3, 39.2, 35.5. HRMS (*m/z*): [M + H]<sup>+</sup> Calcd. for C<sub>13</sub>H<sub>16</sub>NS<sub>2</sub>: 250.0724, found: 250.0713.

**Preparation of L3.** 2-(Bromomethyl)pyridine hydrobromide (100 mg, 0.4 mmol) was added dropwise to a mixture of KOH (57 mg, 1 mmol) and 4-(dimethylamino)benzenethiol (30 mg, 0.2 mmol) in DMF/H<sub>2</sub>O (3 mL/0.3 mL). The reaction mixture was stirred for 4 h at room temperature and then cooled to 0 °C. The mixture was diluted with H<sub>2</sub>O and extracted with EtOAc (4x). The combined organic layer was dried over anhydrous MgSO<sub>4</sub> and concentrated under vacuum. The crude compound was purified by column chromatography (SiO<sub>2</sub>; EtOAc:hexanes = 1:4) yielding the product (33 mg, 65%; yellow liquid). <sup>1</sup>H NMR [400 MHz, CD<sub>3</sub>OD, δ (ppm)]: 8.40 (1H, ddd, *J* = 0.8 Hz, *J* = 4.8 Hz), 7.67 (1H, td, *J* = 7.6 Hz, *J* = 1.6 Hz), 7.25 (1H, ddd, *J* = 1.2 Hz), 7.22-7.14 (3H, m), 6.64-6.60 (2H, m), 4.01 (2H, s), 2.90 (6H, s). <sup>13</sup>C NMR [100 MHz, CD<sub>3</sub>OD, δ (ppm)]: 159.8, 152.0, 149.5, 138.4, 136.0, 125.2, 123.4, 120.6, 113.9, 43.6, 40.6. HRMS (*m/z*): [M + H]<sup>+</sup> Calcd. for C<sub>14</sub>H<sub>17</sub>N<sub>2</sub>S: 245.1112, found: 245.1099.

**Parallel Artificial Membrane Permeability Assay Adapted for the Blood-Brain Barrier (PAMPA–BBB).** PAMPA–BBB experiments were conducted employing the PAMPA Explorer kit (pION Inc., Billerica, MA, USA) following previously reported protocols (1–3). Compounds (25 μM, 200 μL) in Prisma HT buffer (pH 7.4, pION) were added to the wells of a donor plate (number of replicates = 12). The polyvinylidene fluoride (PVDF, 0.45 μM) filter membrane on the acceptor plate was coated with BBB-1 lipid formulation (5 μL, pION).

The acceptor plate was then placed on the top of the donor plate. Brain sink buffer (BSB, 200  $\mu$ L, pION) was added to each well of the acceptor plate and was incubated for 4 h at room temperature without agitation. UV-vis spectra of the solutions in the reference, acceptor, and donor plates were measured by a microplate reader. The PAMPA Explorer software v. 3.5 (pION) was used to calculate the  $-\log P_e$  values for compounds. CNS $\pm$  designations were assigned by comparison with compounds that were identified in the previous reports (4, 5).

**A $\beta$  Aggregation Experiments.** A $\beta_{40}$  or A $\beta_{42}$  was dissolved in ammonium hydroxide [NH<sub>4</sub>OH (aq); 1% v/v]. The resulting solution was lyophilized and stored at  $-80$  °C. A stock solution of A $\beta$  was then prepared by dissolving the lyophilized peptide with NH<sub>4</sub>OH (1% v/v, 10  $\mu$ L) and diluting with ddH<sub>2</sub>O. All A $\beta$  samples were prepared following the previously reported procedures (1–3, 6). The concentration of the peptide solution was determined by measuring the absorbance of the solution at 280 nm ( $\epsilon = 1,450$  M<sup>-1</sup>cm<sup>-1</sup> for A $\beta_{40}$ ;  $\epsilon = 1,490$  M<sup>-1</sup>cm<sup>-1</sup> for A $\beta_{42}$ ). The peptide stock solution was diluted to a final concentration of 25  $\mu$ M in the Chelex-treated buffer [20  $\mu$ M HEPES, pH 6.6 [for Cu(II) samples] or pH 7.4 (for metal-free samples), 150  $\mu$ M NaCl]. For the inhibition studies, compounds [final concentration, 50  $\mu$ M; 1% v/v DMSO; the stock solutions of compounds were prepared using DMSO due to their limited solubility in H<sub>2</sub>O (for **L1** and **L3**, soluble at 150  $\mu$ M in H<sub>2</sub>O; for **L2**, insoluble even at approximately 15  $\mu$ M in H<sub>2</sub>O)] were added to the samples of A $\beta$  (25  $\mu$ M) in the absence and presence of a copper chloride salt (CuCl<sub>2</sub>; 25  $\mu$ M) followed by incubation at 37 °C with constant agitation for 24 h. For the disaggregation studies, A $\beta$  (25  $\mu$ M) was incubated with and without CuCl<sub>2</sub> (25  $\mu$ M) for 24 h at 37 °C with constant agitation to generate preformed A $\beta$  aggregates. The resulting peptide aggregates were then treated with compounds (50  $\mu$ M) and incubated with constant agitation for an additional 24 h. For the experiments under anaerobic conditions, all samples were prepared following the same procedure described above for the aerobic samples in a N<sub>2</sub>-filled glove box.

#### **Electrospray Ionization–Mass Spectrometry (ESI–MS) and Tandem MS (ESI–MS<sup>2</sup>).**

The experiments were performed following the previously reported methods (7–9). A $\beta_{40}$ ,  $\alpha$ -synuclein, human islet amyloid polypeptide (hIAPP), or ubiquitin (100  $\mu$ M) was incubated with compounds (500  $\mu$ M; 1% v/v DMSO) and/or metal ions (100  $\mu$ M) in 20 mM ammonium acetate, pH 7.2 at 37 °C without agitation. CuCl<sub>2</sub>, [Cu(CH<sub>3</sub>CN)<sub>4</sub>]PF<sub>6</sub> (0.1% v/v CH<sub>3</sub>CN), FeCl<sub>2</sub>, FeCl<sub>3</sub>, Co(NO<sub>3</sub>)<sub>2</sub>·nH<sub>2</sub>O, and ZnCl<sub>2</sub> were used as metal salts. Incubated samples were diluted by 10 fold with ddH<sub>2</sub>O and then injected into the mass spectrometer. The capillary voltage, sampling cone voltage, and source temperature were set to 2.8 kV, 70 V, and 40 °C, respectively. The backing pressure was adjusted to 2.7 mbar. The ESI parameters and experimental conditions of tandem MS (ESI–MS<sup>2</sup>) were the same as above. The collision-induced dissociation (CID) was conducted by applying the collision energy in the trap and adjusting the low mass (LM) resolution to 15. More than 200 spectra were obtained for each sample and averaged for the analysis.

**Inductively Coupled Plasma–Mass Spectrometry (ICP–MS).** **L1** (final concentration, 50  $\mu$ M; 1% v/v DMSO) was added to the samples containing A $\beta_{40}$  (25  $\mu$ M) and CuCl<sub>2</sub> (25  $\mu$ M) in ddH<sub>2</sub>O followed by incubation at 37 °C with constant agitation. After 24 h, the samples were centrifuged at 12,000 rpm for 30 min at 4 °C to obtain the supernatants. The Cu concentration in the supernatants was analyzed by the ICP–MS in duplicate.

**Circular Dichroism (CD) Spectroscopy.** A $\beta_{40}$  (25  $\mu$ M) and Cu(NO $_3$ ) $_2$ ·nH $_2$ O (25  $\mu$ M) were incubated in ddH $_2$ O for 24 h with or without **L1** (50  $\mu$ M; 0.1% v/v DMSO). The CD spectra of A $\beta$  samples were collected between 190 and 260 nm with a cell path length of 0.5 mm. The digital integration time, bandwidth, and scanning speed were 4 s, 2 nm, and 20 nm/min, respectively. Each spectrum was smoothed by a Fourier transform. Following the previously reported method (10), the change in the secondary structures of Cu(II)–A $\beta_{40}$  with treatment of **L1** was analyzed.

**Cyclic Voltammetry.** Cyclic voltammograms of **L1–L3** (dissolved in DMSO; final concentration, 1 mM) were recorded in 0.1 M *tetra-N*-butylammonium perchlorate (in DMSO) and 1 M NaCl (in ddH $_2$ O; 1% v/v DMSO) at various scan rates (25, 50, 100, 150, 200, and 250 mV/s) at room temperature. A three-electrode setup is composed of an Ag/Ag(I) reference electrode [RE-1B reference electrode Ag/Ag(I); Qrins, Seoul, Republic of Korea], a Pt wire auxiliary electrode (SPTE platinum electrode; Qrins), and a glassy carbon working electrode (Qrins).

**Gel Electrophoresis with Western Blotting (Gel/Western Blot).** The resultant A $\beta$  species from in vitro experiments were analyzed by the gel/Western blot using an anti-A $\beta$  antibody (6E10) (1–3, 6). The samples (10  $\mu$ L) were separated on a 10–20% Tris-tricine gel (Thermo Fisher Scientific, Waltham, MA, USA). Following the separation, the proteins were transferred onto nitrocellulose membranes and blocked with bovine serum albumin (BSA, 3% w/v, Sigma-Aldrich, St. Louis, MO, USA) in Tris-buffered saline (TBS) containing 0.1% Tween-20 (TBS-T) for 2 h (at room temperature) or overnight (at 4 °C). The membranes were incubated with 6E10 (1:2,000, Covance, Princeton, NJ, USA) in the solution of BSA (2% w/v in TBS-T) for 4 h (at room temperature) or overnight (at 4 °C). After washing with TBS-T (3x, 10 min), a horseradish peroxidase-conjugated goat anti-mouse secondary antibody (1:5,000 in 2% w/v BSA in TBS-T; Cayman Chemical Company, MI, USA) was added for 1.5 h at room temperature. A homemade ECL kit was used to visualize gel/Western blots on a ChemiDoc MP Imaging System (Bio-Rad, Hercules, CA, USA) (7, 8, 11).

**Transmission Electron Microscopy (TEM).** Samples for TEM were prepared following the previously reported methods (1–3, 6–8). Glow-discharged grids (Formvar/Carbon 300-mesh, Electron Microscopy Sciences, Hatfield, PA, USA) were treated with A $\beta$  samples (25  $\mu$ M, 5  $\mu$ L) for 2 min at room temperature. Excess sample was removed using filter paper followed by washing twice with ddH $_2$ O. Each grid incubated with uranyl acetate (1%, ddH $_2$ O, 5  $\mu$ L) for 1 min was blotted off and dried for 15 min at room temperature. Images for each sample were taken on a JEOL JEM-2100 transmission electron microscope (200 kV; 25,000x magnification).

**Dot Blot Assay.** To verify the effect of **L1** on oligomerization of Cu(II)–A $\beta_{40}$ , the samples containing A $\beta_{40}$  (100  $\mu$ M) and CuCl $_2$  (100  $\mu$ M) with and without **L1** (200  $\mu$ M), prepared and incubated for 24 h in 20 mM HEPES, pH 6.6, 150 mM NaCl, were analyzed by a dot blot assay. Moreover, to analyze the modified region of A $\beta$  by hydrogen peroxide (H $_2$ O $_2$ ), a dot blot assay was performed using the 1 and 24 incubated samples of A $\beta_{40}$  (100  $\mu$ M) with or without CuCl $_2$  (100  $\mu$ M) in the absence and presence of H $_2$ O $_2$  (5 mM) in 20 mM ammonium acetate, pH 7.2. The resulting solution (5  $\mu$ L) was spotted on a nitrocellulose membrane and blocked with a BSA solution (3% w/v) in 0.01% TBS-T at room temperature for 12 h. The membrane was incubated with a primary antibody [6E10 (1:2,000), A11 (1:1,000);



Invitrogen, Carlsbad, CA, USA), OC (1:2,000; Merck Millipore, Billerica, MA, USA), or anti-A $\beta_{40}$  (1:2,000; Abcam, Cambridge, UK)] in the solution of BSA (2% w/v in TBS-T) for 4 h at room temperature. After washing with 0.01% TBS-T (3x, 7 min), the horseradish peroxidase-conjugated goat anti-mouse (1:5,000; for 6E10 and anti-A $\beta_{40}$ ) or goat anti-rabbit (1:4,000; for A11 and OC) secondary antibody in the solution of BSA (2% w/v in TBS-T) was added to the membrane and incubated for 2 h at room temperature. A homemade ECL kit was used to visualize the results on a ChemiDoc MP Imaging System (7, 8, 11).

**Cell Viability Studies.** The human neuroblastoma SH-SY5Y cell line was purchased from the American Type Culture Collection (ATCC, VA, USA). The cell line was maintained in media containing 50% minimum essential medium (MEM) and 50% F12 (GIBCO, NY, USA), and supplemented with 10% fetal bovine serum (Sigma-Aldrich), 100 U/mL penicillin, and 100 mg/mL streptomycin (GIBCO). Cells were grown and maintained at 37 °C in a humidified atmosphere with 5% CO<sub>2</sub>. The cells used for our studies did not indicate mycoplasma contamination. Cell viability upon treatment with compounds was determined by the MTT assay. A $\beta_{40}$  or A $\beta_{42}$  (50  $\mu$ M) and CuCl<sub>2</sub> (50  $\mu$ M) were pre-incubated with or without compounds (50  $\mu$ M; 1% v/v DMSO) for 24 h at 37 °C with constant agitation. Cells were seeded in a 96 well plate (10,000 cells in 100  $\mu$ L per well) and treated with the resultant samples (final concentration of 10  $\mu$ M). After 24 h incubation, MTT [25  $\mu$ L of 5 mg/mL in PBS (pH 7.4, GIBCO)] was added to each well, and the plate was incubated for 4 h at 37 °C. Formazan produced by cells was solubilized using an acidic solution of DMF (pH 4.5, 50% v/v, aq) and sodium dodecyl sulfate (SDS; 20% w/v) overnight at room temperature in the dark. The absorbance was measured at 600 nm by a microplate reader. Cell viability was calculated relative to that of the cells containing an equivalent amount of DMSO.

**Trolox Equivalent Antioxidant Capacity (TEAC) Assay.** The ability of compounds to scavenge free organic radicals in EtOH was determined by the assay according to a previously reported method with slight modifications (1, 7). To generate blue ABTS cation radicals [ABTS<sup>•+</sup>; ABTS = 2,2'-azino-bis(3-ethylbenzothiazoline-6-sulfonic acid) diammonium salt; Sigma-Aldrich], ABTS (7.0 mM, Sigma-Aldrich) with potassium persulfate [K<sub>2</sub>(SO<sub>4</sub>)<sub>2</sub>; 2.5 mM] was dissolved in ddH<sub>2</sub>O (5 mL) and incubated for 16 h in the dark at room temperature. The resulting solution of ABTS<sup>•+</sup> was diluted with EtOH to absorbance of approximately 0.7 at 734 nm. The solution of ABTS<sup>•+</sup> (200  $\mu$ L) was added to the wells of a clear 96 well plate. Our compounds and Trolox (Trolox = 6-hydroxy-2,5,7,8-tetramethyl-chroman-2-carboxylic acid) were dissolved in EtOH and treated to the solution of ABTS<sup>•+</sup>. The final concentrations (2.1, 4.3, 6.4, 8.6, 11, and 16  $\mu$ M) of compounds and Trolox were used. After 10 min incubation at room temperature, the absorbance at 750 nm was recorded. The percent inhibition was calculated according to the measured absorbance [% inhibition = 100  $\times$  (A<sub>0</sub> - A)/A<sub>0</sub>, where A and A<sub>0</sub> are the absorbance of the samples with and without compound treatment, respectively] and was plotted as a function of compound concentration. The TEAC values of compounds for each time point were calculated as a ratio of their slope to that of Trolox.

**H<sub>2</sub>O<sub>2</sub>/Peroxidase Assay.** The ability of **L1** to quench H<sub>2</sub>O<sub>2</sub> was evaluated using an Amplex Red H<sub>2</sub>O<sub>2</sub>/peroxidase assay kit (Thermo Fisher Scientific). Following the manufacturer's procedure with minor modifications, **L1** (final concentration, 5, 50, and 500  $\mu$ M; 1% v/v DMSO) and an equivalent amount of DMSO (1% v/v) were treated to a solution of H<sub>2</sub>O<sub>2</sub> (50  $\mu$ M) in a 96 well plate. In addition, to evaluate the effect of **L1** on the Cu(I/II)-

A $\beta$ -mediated production of reactive oxygen species, **L1** (final concentration, 50  $\mu$ M; 1% v/v DMSO) was incubated with A $\beta_{40}$  (25  $\mu$ M), CuCl<sub>2</sub> (25  $\mu$ M), and *L*-ascorbate (1 mM; Sigma-Aldrich). Upon addition of the working solution containing Amplex Red (25  $\mu$ M) and horseradish peroxidase (1 U/mL) in 50 mM sodium phosphate buffer, pH 7.4, the plate was incubated at room temperature for 30 min. The absorbance of resorufin, a red chromophore product from Amplex Red, was measured at 590 nm. The amount of resultant H<sub>2</sub>O<sub>2</sub> was determined based on the standard curve that was obtained using various concentrations of H<sub>2</sub>O<sub>2</sub> (0, 5, 10, 15, 20, 25, 30, 35, 40, 50, and 70  $\mu$ M).

**Scheme S1.** Synthetic routes to **L1–L3**.

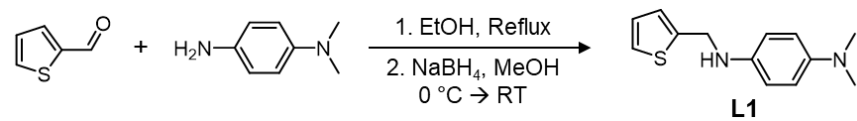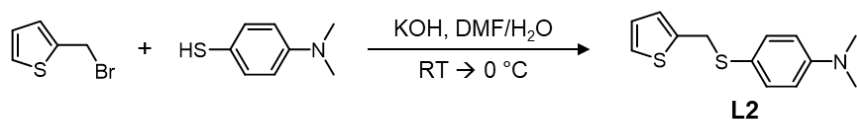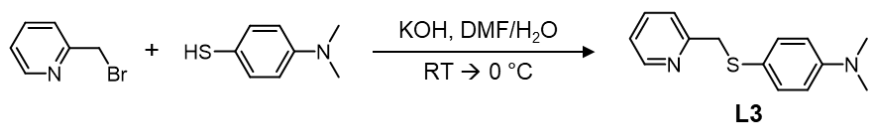

**Table S1.** Values (MW,  $clogP$ , HBA, HBD, PSA,  $\log BB$ , and  $-\log P_e$ ) of **L1–L3**.

|                                    | <b>L1</b>             | <b>L2</b>             | <b>L3</b>             | Lipinski's Rules and Others                          |
|------------------------------------|-----------------------|-----------------------|-----------------------|------------------------------------------------------|
| MW <sup>a</sup>                    | 232                   | 249                   | 244                   | ≤ 450                                                |
| $clogP$ <sup>b</sup>               | 15.3                  | 4.08                  | 2.94                  | ≤ 5                                                  |
| HBA <sup>c</sup>                   | 2                     | 1                     | 2                     | ≤ 10                                                 |
| HBD <sup>d</sup>                   | 1                     | 0                     | 0                     | ≤ 5                                                  |
| PSA (Å <sup>2</sup> ) <sup>e</sup> | 15.3                  | 3.24                  | 16.1                  | ≤ 90                                                 |
| $\log BB$ <sup>f</sup>             | 0.345                 | 0.702                 | 0.338                 | < -1.0 (poorly)                                      |
| $-\log P_e$ <sup>g</sup>           | 4.31 ± 0.13<br>(CNS+) | 4.61 ± 0.22<br>(CNS+) | 4.35 ± 0.07<br>(CNS+) | $-\log P_e < 5.4$ (CNS+)<br>$-\log P_e > 5.7$ (CNS-) |

<sup>a</sup>MW, molecular weight; <sup>b</sup> $clogP$ , calculated log of water-octanol partition coefficient; <sup>c</sup>HBA, hydrogen bond acceptor atom; <sup>d</sup>HBD, hydrogen bond donor atom; <sup>e</sup>PSA, polar surface area; <sup>f</sup> $\log BB$ , logarithm of the ratio of the concentration of the compound in the brain to concentration in the blood,  $0.152 \times clogP - 0.0148 \times PSA + 0.139$ ; <sup>g</sup> $-\log P_e$ , the value obtained using the PAMPA–BBB assay with the PAMPA Explorer software v. 3.5. Compounds assigned to be CNS+ are able to penetrate the BBB and thus be available in the central nervous system (CNS).

**Table S2.** Quantitative data of the cyclic voltammograms of compounds in DMSO.

| Scan rate<br>(mV/s) | L1           |                     | L2           |                     | L3           |                     |
|---------------------|--------------|---------------------|--------------|---------------------|--------------|---------------------|
|                     | $E_{pa}$ (V) | $i_{pa}$ ( $\mu$ A) | $E_{pa}$ (V) | $i_{pa}$ ( $\mu$ A) | $E_{pa}$ (V) | $i_{pa}$ ( $\mu$ A) |
| 25                  | 0.21         | 7.2                 | 0.72         | 19                  | 0.73         | 23                  |
| 50                  | 0.23         | 14                  | 0.73         | 26                  | 0.75         | 32                  |
| 100                 | 0.24         | 19                  | 0.75         | 39                  | 0.76         | 45                  |
| 150                 | 0.25         | 20                  | 0.76         | 48                  | 0.77         | 49                  |
| 200                 | 0.26         | 26                  | 0.76         | 49                  | 0.78         | 57                  |
| 250                 | 0.27         | 42                  | 0.77         | 53                  | 0.79         | 61                  |

**Table S3.** Quantitative data of the cyclic voltammograms of compounds in H<sub>2</sub>O.<sup>a</sup>

| Scan rate<br>(mV/s) | <b>L1</b>           |                      |                     |                      |
|---------------------|---------------------|----------------------|---------------------|----------------------|
|                     | E <sub>pa</sub> (V) | i <sub>pa</sub> (μA) | E <sub>pc</sub> (V) | i <sub>pc</sub> (μA) |
| 25                  | 0.116               | 2.6                  | 0.0793              | 0.11                 |
| 50                  | 0.117               | 4.0                  | 0.0793              | 0.34                 |
| 100                 | 0.120               | 5.7                  | 0.0778              | 0.37                 |
| 150                 | 0.124               | 9.3                  | 0.0778              | 1.0                  |
| 200                 | 0.129               | 12                   | 0.0780              | 1.6                  |
| 250                 | 0.129               | 15                   | 0.0780              | 1.6                  |

  

| Scan rate<br>(mV/s) | <b>L3</b>           |                      |                     |                      |
|---------------------|---------------------|----------------------|---------------------|----------------------|
|                     | E <sub>pa</sub> (V) | i <sub>pa</sub> (μA) | E <sub>pc</sub> (V) | i <sub>pc</sub> (μA) |
| 25                  | 0.534               | 4.9                  | 0.484               | 2.7                  |
| 50                  | 0.538               | 7.0                  | 0.483               | 4.2                  |
| 100                 | 0.539               | 11                   | 0.483               | 6.3                  |
| 150                 | 0.540               | 13                   | 0.483               | 7.8                  |
| 200                 | 0.540               | 16                   | 0.483               | 9.5                  |
| 250                 | 0.543               | 21                   | 0.480               | 11                   |

<sup>a</sup>Note that the redox potential of **L2** could not be measured in H<sub>2</sub>O due to its limited solubility.



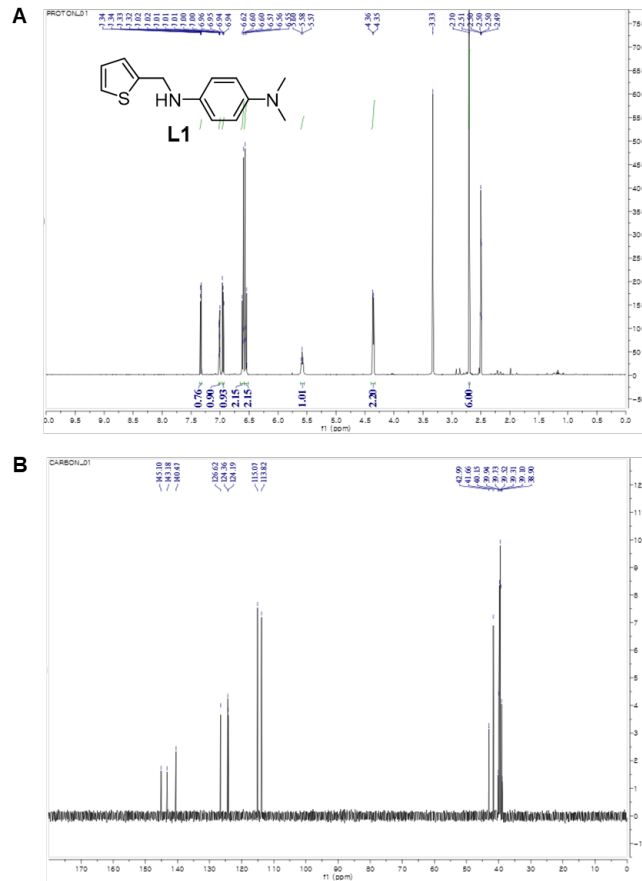

**Fig. S1.**  $^1\text{H}$  (A, 400 MHz) and  $^{13}\text{C}$  (B, 100 MHz) NMR spectra of **L1** in  $\text{DMSO-}d_6$ .



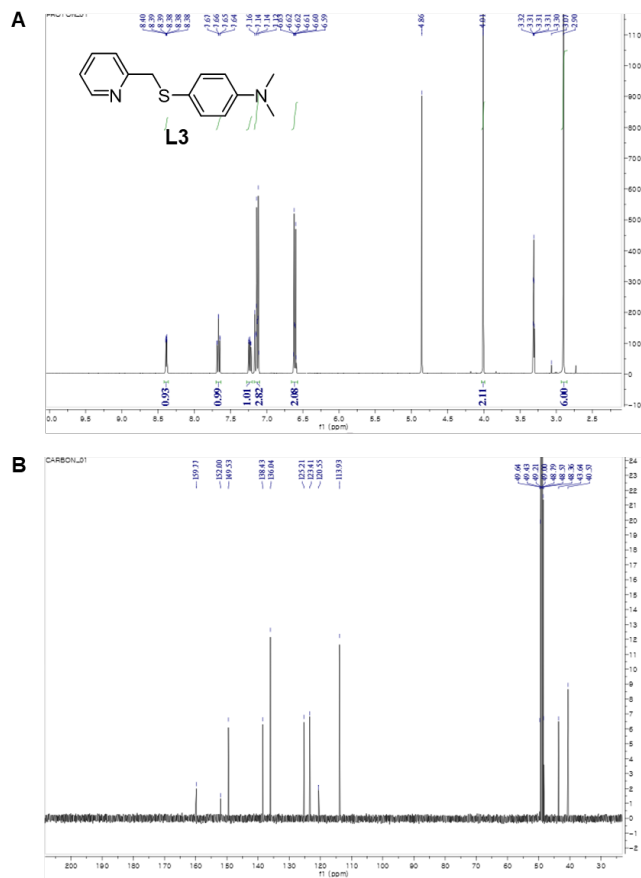

**Fig. S3.**  $^1\text{H}$  (A, 400 MHz) and  $^{13}\text{C}$  (B, 100 MHz) NMR spectra of **L3** in  $\text{CD}_3\text{OD}$ .

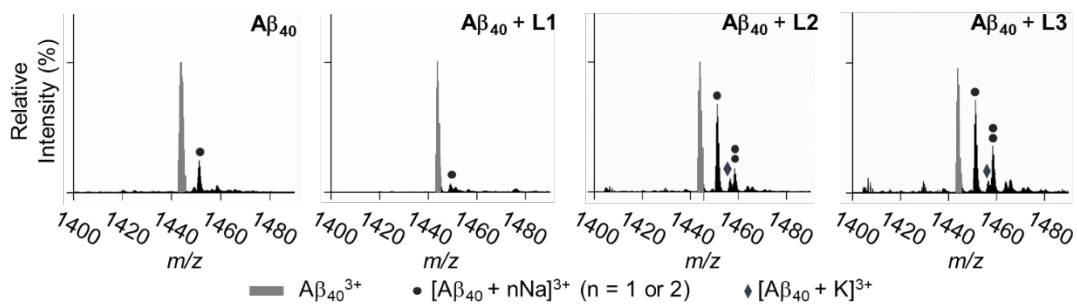

**Fig. S4.** Interaction of L1–L3 with metal-free  $A\beta_{40}$ , analyzed by ESI–MS.  $Na^+$  and  $K^+$  adducts of  $A\beta_{40}$  are marked with black dots and diamonds, respectively. Conditions were as follows:  $[A\beta_{40}] = 100 \mu M$ ;  $[compound] = 500 \mu M$ ; incubation for 3 h; 20 mM ammonium acetate, pH 7.2; 37 °C; no agitation. The samples were diluted with  $H_2O$  by 10 fold prior to injection to the mass spectrometer.

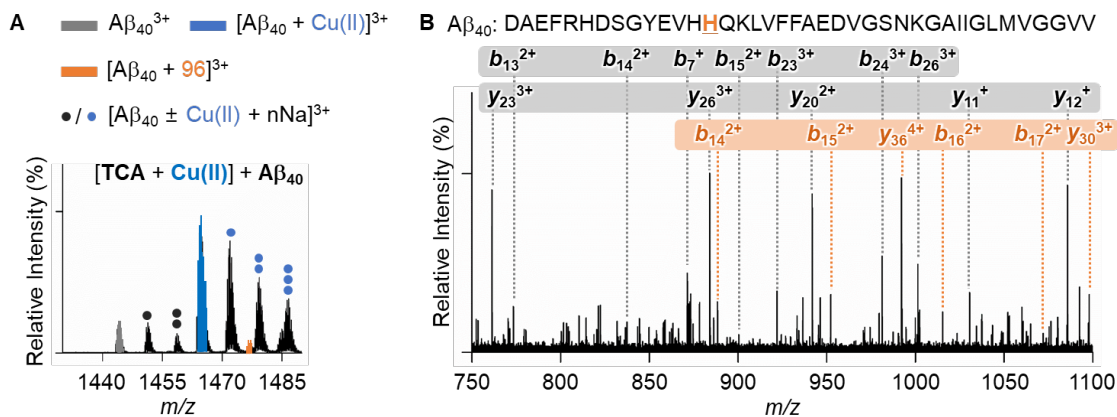

**Fig. S5.** Analysis of Cu(II)-added  $A\beta_{40}$  upon treatment with **TCA** by ESI-MS. (A) ESI-MS spectrum of the +3-charged Cu(II)-added  $A\beta_{40}$  monomer incubated with **TCA**. The peak of the covalent adduct between  $A\beta_{40}$  and 2-methylthiophene (1,475  $m/z$ ) is indicated in orange.  $\text{Na}^+$  adducts of  $A\beta_{40}$  with or without Cu(II) are shown with blue and black dots. (B) ESI-MS<sup>2</sup> spectrum of the covalent adduct (1,475  $m/z$ ). The gray and orange boxes indicate  $b_x$  and  $y_x$  fragments corresponding to  $A\beta$  and  $A\beta$  bound to 2-methylthiophene, respectively. Conditions were as follows:  $[A\beta_{40}] = 100 \mu\text{M}$ ;  $[\text{CuCl}_2] = 100 \mu\text{M}$ ;  $[\text{TCA}] = 500 \mu\text{M}$ ; incubation for 1 h; 20 mM ammonium acetate, pH 7.2; 37 °C; no agitation. The sample was diluted with  $\text{H}_2\text{O}$  by 10 fold prior to injection to the mass spectrometer.

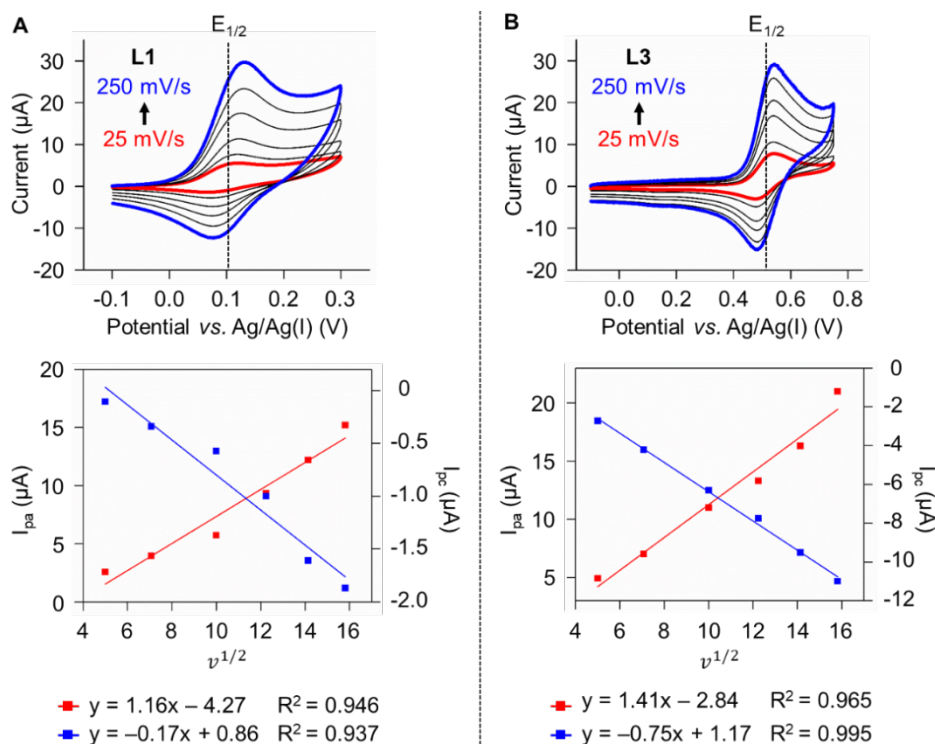

**Fig. S6.** Cyclic voltammograms of **L1** and **L3** in  $\text{H}_2\text{O}$ . The dashed black line indicates the  $E_{1/2}$  value of compounds. (A and B) Plots of the current ( $i_{pa}$  and  $i_{pc}$ ) as a function of scan rate ( $v^{1/2}$ ) show the quasi-reversible and reversible couples of **L1** and **L3**, respectively. Note that the cyclic voltammogram of **L2** in  $\text{H}_2\text{O}$  could not be obtained due to its limited solubility. Conditions were as follows: [compound] = 1 mM; 1 M NaCl (aq); various scan rates [25 (red), 50, 100, 150, 200 and 250 (blue) mV/s]; room temperature; three electrodes composed of the glassy carbon working electrode, platinum counter electrode, and Ag/Ag(I) reference electrode.



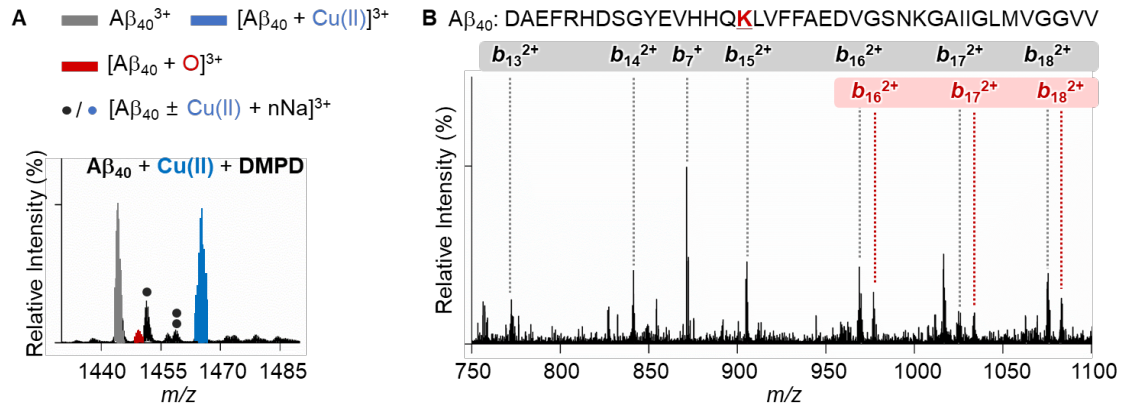

**Fig. S7.** Analysis of the oxidized  $\text{A}\beta_{40}$  by treatment of **DMPD** through ESI-MS. (A) ESI-MS spectrum of the +3-charged Cu(II)-added  $\text{A}\beta_{40}$  monomer incubated with **DMPD**. (B) ESI-MS<sup>2</sup> spectrum of the singly oxidized  $\text{A}\beta_{40}$  produced upon addition of **DMPD**. Chemical bonds of the selected ion at 1,449  $m/z$  are cleaved by CID. The gray and red boxes indicate  $b_x$  fragments corresponding to  $\text{A}\beta$  and oxidized  $\text{A}\beta$ , respectively. Conditions were as follows:  $[\text{A}\beta_{40}] = 100 \mu\text{M}$ ;  $[\text{CuCl}_2] = 100 \mu\text{M}$ ;  $[\text{DMPD}] = 500 \mu\text{M}$ ; incubation for 1 h; 20 mM ammonium acetate, pH 7.2; 37 °C; no agitation. The sample was diluted with  $\text{H}_2\text{O}$  by 10 fold prior to injection to the mass spectrometer.

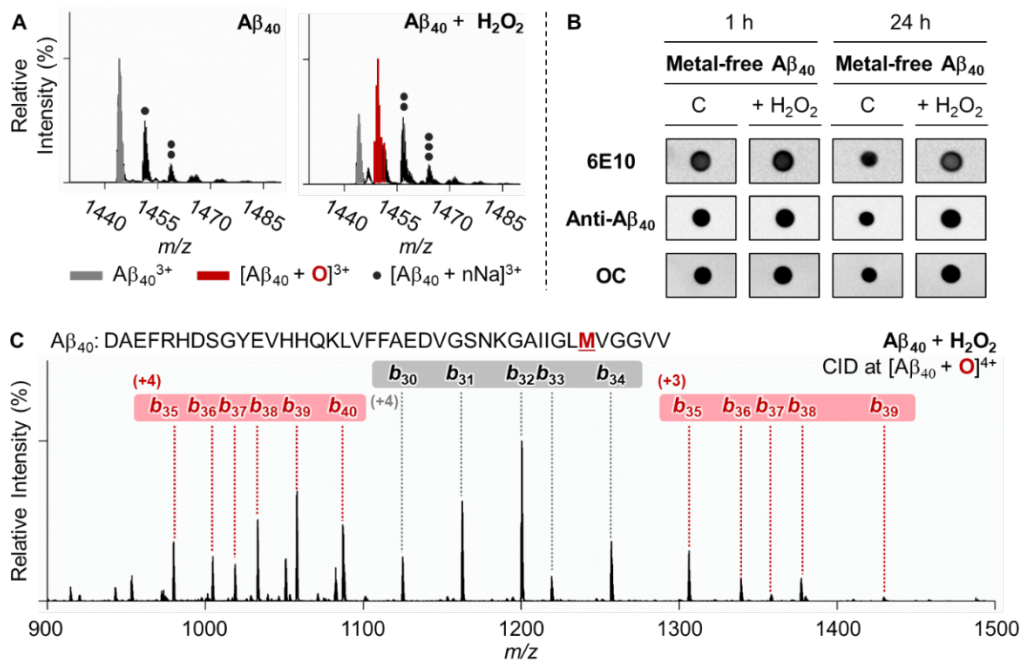

**Fig. S8.** Analysis of metal-free  $A\beta_{40}$  by treatment of  $H_2O_2$ . (A) ESI-MS spectra of the +3-charged  $A\beta_{40}$  monomer incubated with and without  $H_2O_2$ . (B) Dot blots of the metal-free  $A\beta_{40}$  obtained upon incubation with  $H_2O_2$ . The epitopes of 6E10 and anti- $A\beta_{40}$  antibodies are the N- and C-termini of  $A\beta_{40}$ , respectively. The OC antibody was used to detect  $A\beta_{40}$  fibrils. (C) ESI-MS<sup>2</sup> spectrum of the singly oxidized  $A\beta_{40}$  generated by  $H_2O_2$ . Chemical bonds of the selected ion at 1,449  $m/z$  were cleaved by CID. The gray and red boxes indicate  $b_x$  fragments corresponding to  $A\beta$  and oxidized  $A\beta$ , respectively. Conditions were as follows:  $[A\beta_{40}] = 100 \mu M$ ;  $[H_2O_2] = 5 \text{ mM}$ ; incubation for 1 or 24 h; 20 mM ammonium acetate, pH 7.2; 37 °C; no agitation. The samples were diluted with  $H_2O$  by 10 fold prior to injection to the mass spectrometer.

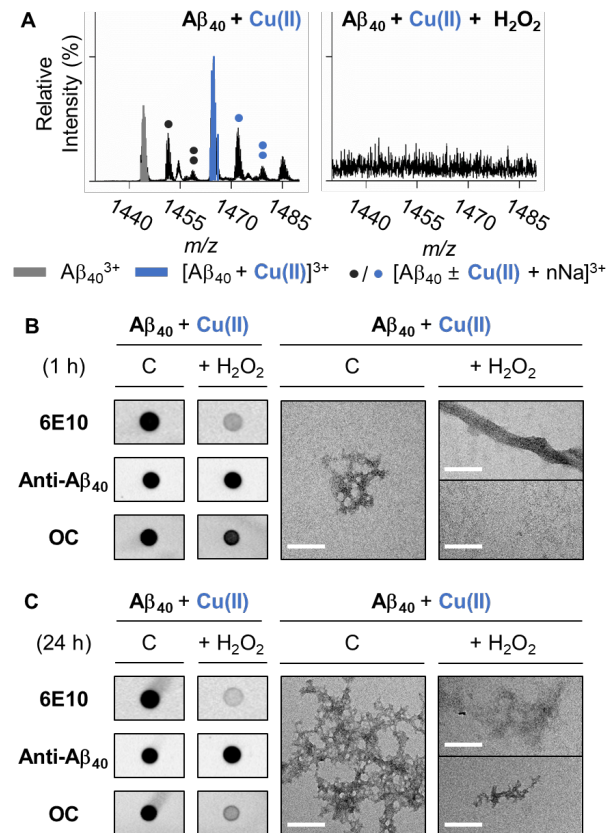

**Fig. S9.** Analysis of Cu(II)-treated  $A\beta_{40}$  treated with  $H_2O_2$ . (A) ESI-MS spectra of the +3-charged Cu(II)- $A\beta_{40}$  monomer incubated with and without  $H_2O_2$ . (B and C) Dot blots and TEM images of Cu(II)-added  $A\beta_{40}$  species produced by treatment of  $H_2O_2$ . The epitopes of 6E10 and anti- $A\beta_{40}$  antibodies are the N- and C-termini of  $A\beta_{40}$ , respectively. The OC antibody was used to detect  $A\beta_{40}$  fibrils. Scale bars (for TEM), 200 nm. Conditions were as follows:  $[A\beta_{40}] = 100 \mu M$ ;  $[CuCl_2] = 100 \mu M$ ;  $[H_2O_2] = 5 \text{ mM}$ ; incubation for 1 or 24 h; 20 mM ammonium acetate, pH 7.2; 37 °C; no agitation. The samples were diluted with  $H_2O$  by 10 fold prior to injection to the mass spectrometer.

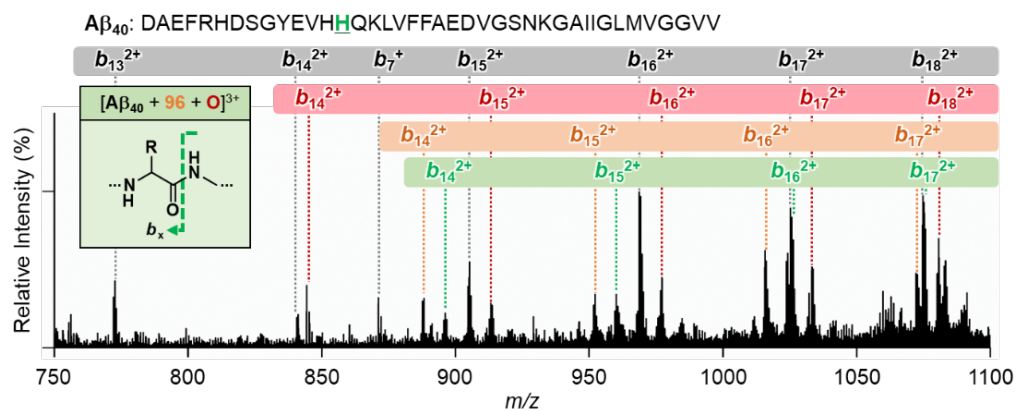

**Fig. S10.** ESI-MS<sup>2</sup> spectrum of the singly oxidized covalent A $\beta_{40}$  adduct,  $[A\beta_{40} + 96 + O]^{3+}$ , detected at 1,480  $m/z$  in Fig. 2A. The gray, red, orange, and green boxes indicate  $b_x$  fragments corresponding to A $\beta$ , oxidized A $\beta$ , A $\beta$  bound to 2-methylthiophene, and oxidized A $\beta$  bound to 2-methylthiophene, respectively. Conditions were as follows:  $[A\beta_{40}] = 100 \mu\text{M}$ ;  $[\text{CuCl}_2] = 100 \mu\text{M}$ ;  $[\text{L1}] = 500 \mu\text{M}$ ; incubation for 1 h; 20 mM ammonium acetate, pH 7.2; 37 °C; no agitation. The samples were diluted with H<sub>2</sub>O by 10 fold prior to injection to the mass spectrometer.

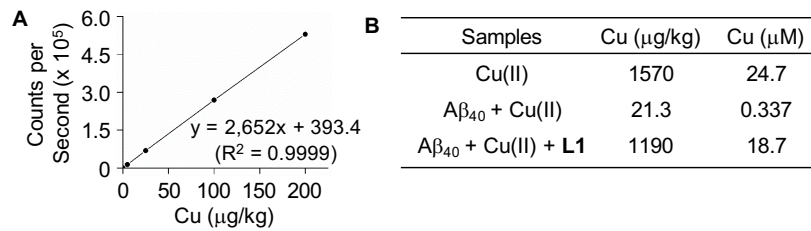

**Fig. S11.** Concentration of copper in the supernatants of samples, measured by ICP–MS. (A and B) The amount of copper was determined by the standard curve that was obtained using its various concentrations (0, 5, 25, 100 and 200  $\mu\text{M}$ ). Conditions were as follows:  $[\text{A}\beta_{40}] = 25 \mu\text{M}$ ;  $[\text{CuCl}_2] = 25 \mu\text{M}$ ; [compound] = 50  $\mu\text{M}$ ; 24 h incubation; 37  $^\circ\text{C}$ ; constant agitation; centrifugation at 12,000 rpm at 4  $^\circ\text{C}$  to obtain the supernatants of samples.

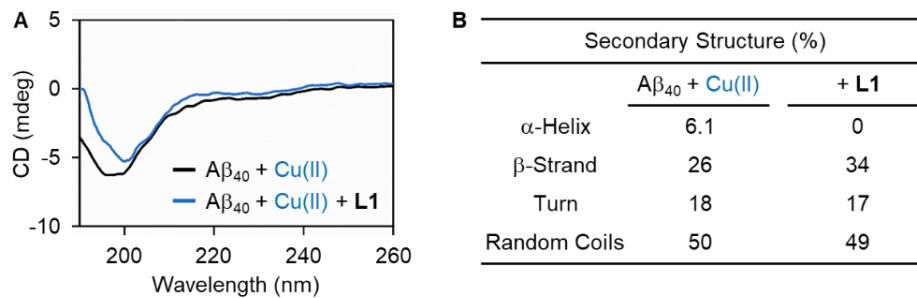

**Fig. S12.** Change in the secondary structures of Cu(II)-treated A $\beta$ <sub>40</sub> upon treatment of **L1**, monitored by CD spectroscopy. (A) CD spectra of the Cu(II)-added A $\beta$ <sub>40</sub> samples incubated with or without **L1**, presented in the blue and black lines, respectively. (B) Analysis of the secondary structures of the samples from (A). Conditions were as follows: [A $\beta$ <sub>40</sub>] = 25  $\mu$ M; [Cu(II)] = 25  $\mu$ M; [**L1**] = 50  $\mu$ M; incubation for 24 h; H<sub>2</sub>O; 37 °C; constant agitation.



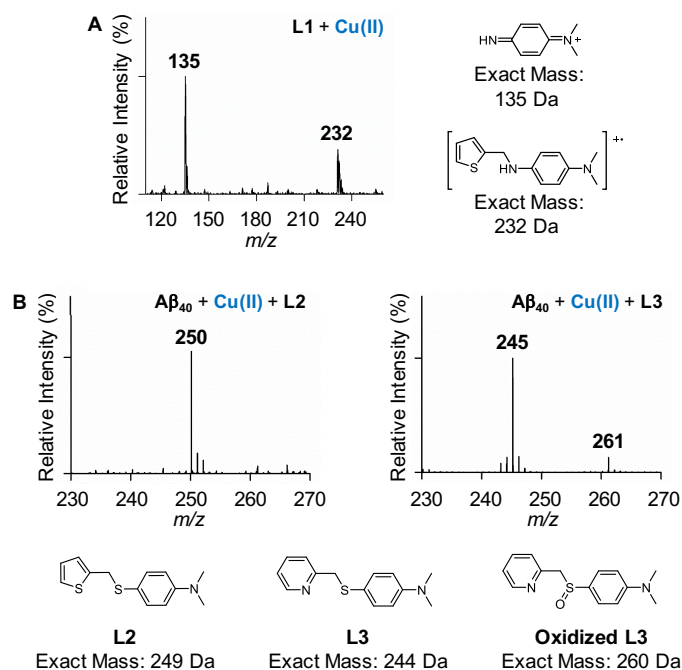

**Fig. S13.** Transformation of **L1–L3** in the presence of Cu(II) and/or A $\beta$ <sub>40</sub>, analyzed by ESI–MS. (A) Cu(II)-mediated transformation of **L1**, monitored by ESI–MS. The fragmentation and oxidation of **L1** were observed at 135 and 232  $m/z$ , respectively. (B) ESI–MS spectra of **L2** and **L3** upon incubation with A $\beta$ <sub>40</sub> and Cu(II). The oxidation of **L3** was indicated at 261  $m/z$ . Conditions were as follows: [A $\beta$ <sub>40</sub>] = 100  $\mu$ M; [CuCl<sub>2</sub>] = 100  $\mu$ M; [compound] = 500  $\mu$ M; incubation for 1 h; 20 mM ammonium acetate, pH 7.2; 37 °C; no agitation. The samples were diluted with H<sub>2</sub>O by 10 fold prior to injection to the mass spectrometer.

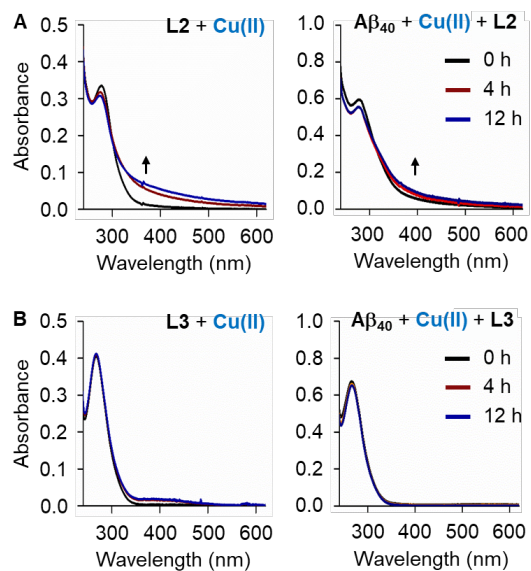

**Fig. S14.** Change of **L2** and **L3** in the presence of Cu(II) with or without A $\beta_{40}$ , analyzed by UV-vis. (A and B) Optical spectra of **L2** and **L3** in the presence of Cu(II) upon incubation with or without A $\beta_{40}$  for 0, 4, and 12 h. Conditions were as follows: [A $\beta_{40}$ ] = 25  $\mu$ M; [CuCl<sub>2</sub>] = 25  $\mu$ M; [L2 or L3] = 50  $\mu$ M; room temperature; incubation for 1 (black), 4 (orange), and 12 h (blue).

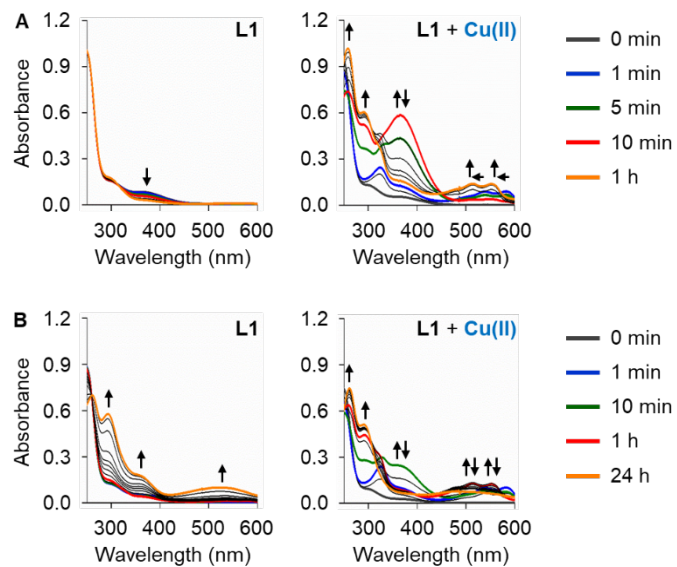

**Fig. S15.** Stability of **L1** under the experimental conditions presented in this study. Optical spectra of **L1** were recorded in the absence and presence of Cu(II). Conditions were as follows: (A) for ESI-MS: [**L1**] = 50  $\mu$ M; [ $\text{CuCl}_2$ ] = 10  $\mu$ M; 20 mM ammonium acetate, pH 7.2; 37  $^\circ\text{C}$ ; incubation for 1 h; (B) for gel/Western blot: [**L1**] = 50  $\mu$ M; [ $\text{CuCl}_2$ ] = 25  $\mu$ M; 20  $\mu$ M HEPES, 150  $\mu$ M NaCl; 37  $^\circ\text{C}$ ; incubation for 24 h.

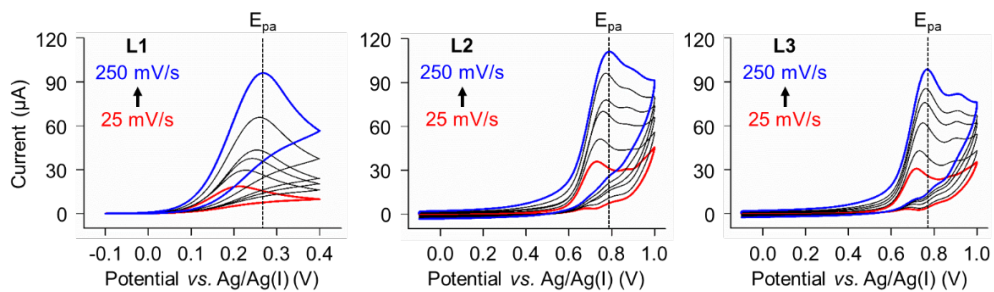

**Fig. S16.** Cyclic voltammograms of **L1–L3** at various scan rates in DMSO. The dashed black line indicates the anodic peak potential ( $E_{pa}$ ) of compounds at 250 mV/s. Conditions were as follows: [compound] = 1 mM; 0.1 M *tetra-N*-butylammonium perchlorate; various scan rates [25 (red), 50, 100, 150, 200 and 250 (blue) mV/s]; room temperature; three electrodes composed of the glassy carbon working electrode, platinum counter electrode, and Ag/Ag(I) reference electrode.

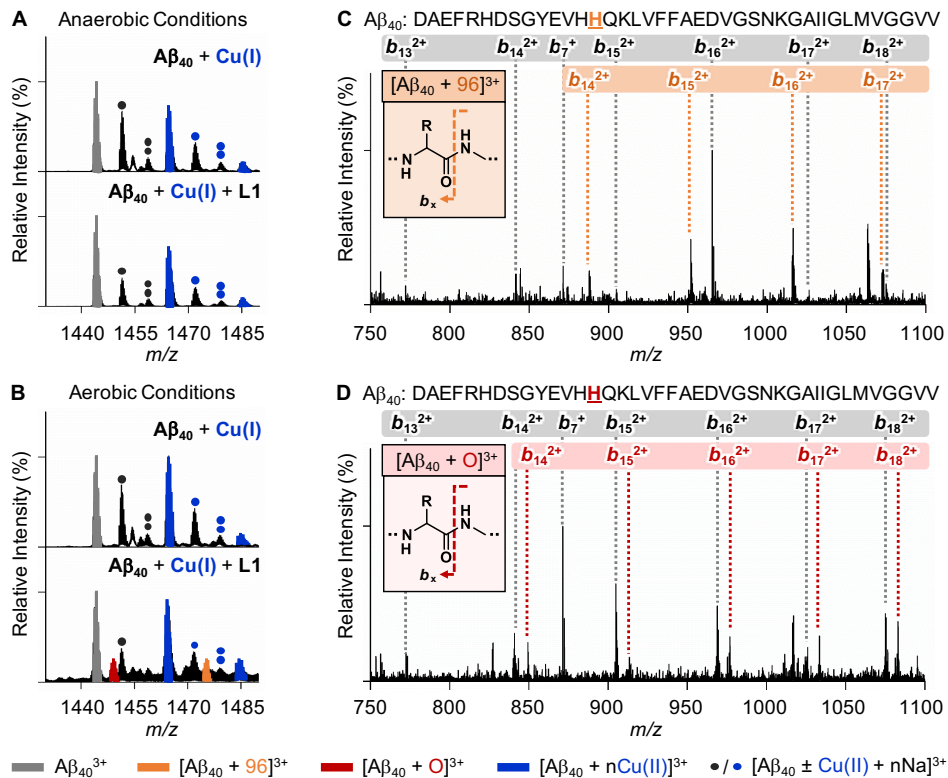

**Fig. S17.** Interaction of **L1** with Cu(I)-treated  $A\beta$  in the absence and presence of  $O_2$ , analyzed by ESI-MS and ESI-MS<sup>2</sup>. (A and B) ESI-MS spectra of the +3-charged monomeric  $A\beta$  species from the samples of Cu(I)-added  $A\beta_{40}$  incubated with and without **L1** under anaerobic and aerobic conditions. (C and D) ESI-MS<sup>2</sup> spectra of the covalent adduct (1,475  $m/z$ ) and the singly oxidized  $A\beta_{40}$  (1,449  $m/z$ ) produced upon reaction of Cu(I)-treated  $A\beta$  with **L1** under aerobic conditions. Conditions were as follows:  $[A\beta_{40}] = 100 \mu M$ ;  $[Cu(I)] = 100 \mu M$ ;  $[L1] = 500 \mu M$ ; incubation for 1 h; 20 mM ammonium acetate, pH 7.2; 37 °C; no agitation. The samples were diluted with  $H_2O$  by 10 fold under aerobic conditions prior to injection to the mass spectrometer.

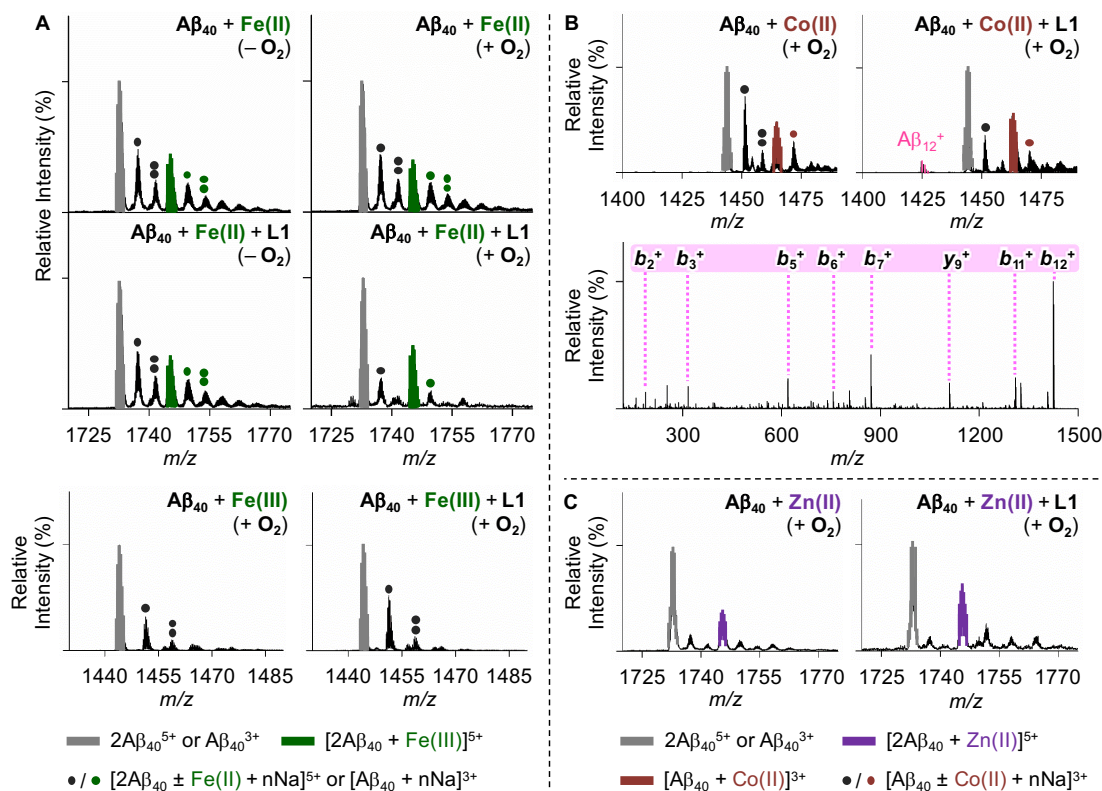

**Fig. S18.** Interactions of **L1** with Fe(II/III)-, Co(II)-, and Zn(II)-added A $\beta$  in the absence and presence of O<sub>2</sub>, analyzed by ESI-MS. (A) Spectra of Fe(II)- or Fe(III)-treated A $\beta$ <sub>40</sub> upon incubation with **L1** under anaerobic or aerobic conditions. (B) ESI-MS spectra of the +3-charged Co(II)-added A $\beta$ <sub>40</sub> monomer incubated with and without **L1** under aerobic conditions. The ESI-MS<sup>2</sup> spectrum of the selected ion at 1,424  $m/z$  presents the formation of a fragmented A $\beta$ <sub>40</sub>, A $\beta$ <sub>12</sub>, upon reaction of **L1** with Co(II)-added A $\beta$ <sub>40</sub>. The magenta box indicates  $b$  and  $y$  fragments corresponding to A $\beta$ <sub>12</sub>. (C) Spectra of Zn(II)-added A $\beta$ <sub>40</sub> upon treatment of **L1** under aerobic conditions. Conditions were as follows: [A $\beta$ <sub>40</sub>] = 100  $\mu$ M; [M(II) or M(III)] = 100  $\mu$ M; [**L1**] = 500  $\mu$ M; incubation for 1 h; 20 mM ammonium acetate, pH 7.2; 37 °C; no agitation. The samples were diluted with H<sub>2</sub>O by 10 fold prior to injection to the mass spectrometer. Note that Co(II)-bound A $\beta$ <sub>40</sub> monomer was observed under our experimental conditions, but Fe(II)-, Fe(III)-, and Zn(II)-bound A $\beta$ <sub>40</sub> monomer was not detected.



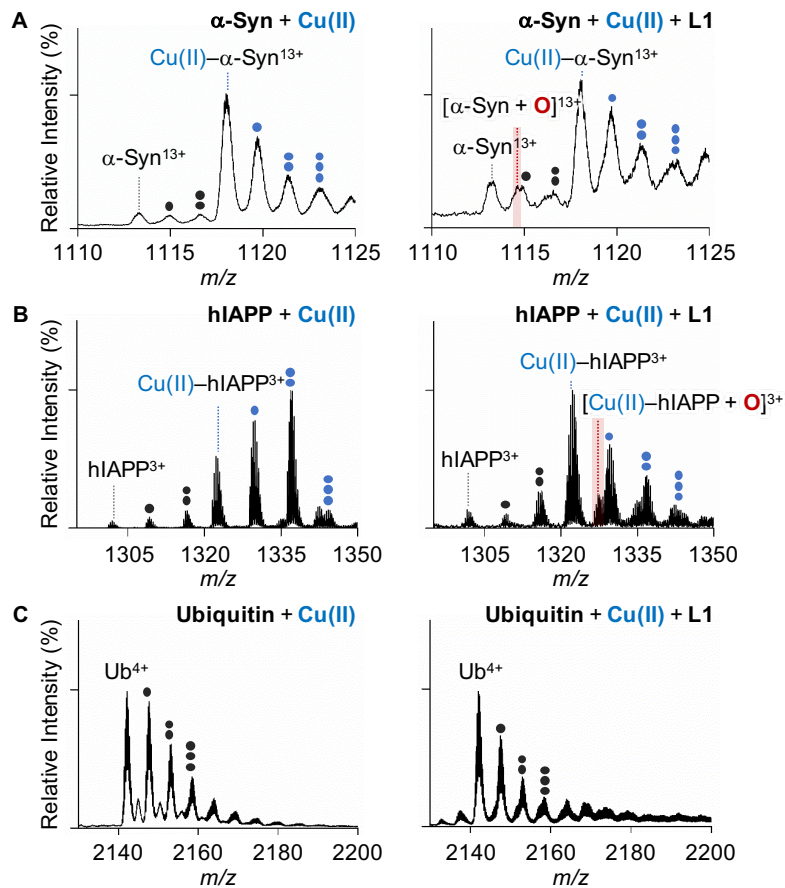

**Fig. S19.** ESI-MS analysis of Cu(II)-added  $\alpha$ -synuclein ( $\alpha$ -Syn), human islet amyloid polypeptide (hIAPP), and ubiquitin with treatment of L1. (A–C) Spectra of  $\alpha$ -Syn, hIAPP, and ubiquitin incubated with Cu(II) and/or L1. Na<sup>+</sup> adducts of proteins with or without Cu(II) are shown with blue and black dots. Conditions were as follows: [proteins] = 100  $\mu$ M; [CuCl<sub>2</sub>] = 100  $\mu$ M; [L1] = 500  $\mu$ M; incubation for 1 h; 20 mM ammonium acetate, pH 7.2; 37 °C; no agitation. The samples were diluted with H<sub>2</sub>O by 10 fold prior to injection to the mass spectrometer.

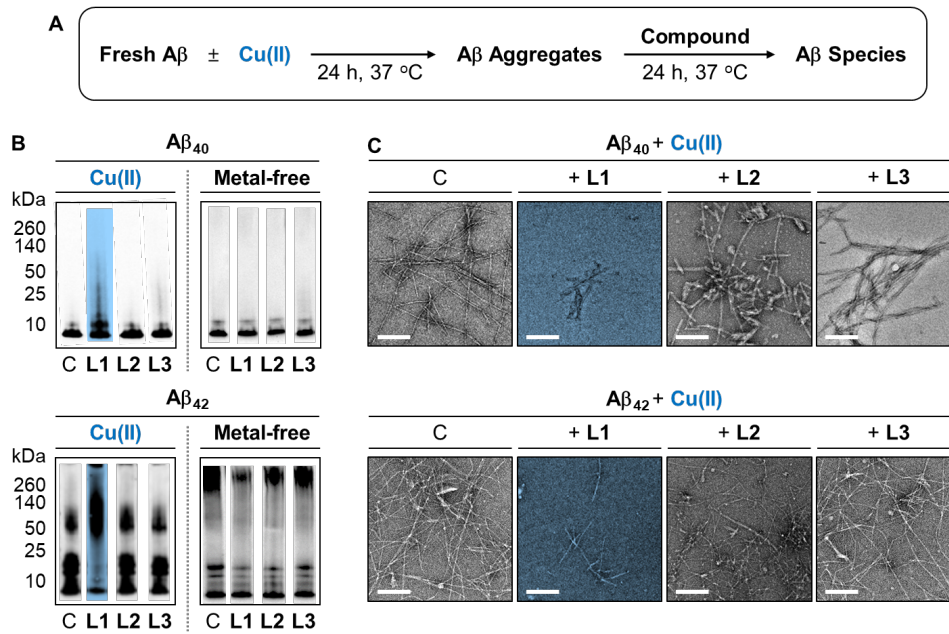

**Fig. S20.** Impact of L1–L3 on preformed Cu(II)-bound and metal-free A $\beta$  aggregates. (A) Scheme of the disaggregation experiments. (B) Analysis of the size distribution of the resultant A $\beta_{40}$  (top) and A $\beta_{42}$  (bottom) species by the gel/Western blot using an anti-A $\beta$  antibody (6E10). Lanes are as follows: C, A $\beta$  with or without CuCl<sub>2</sub>; L1, C with L1; L2, C with L2; L3, C with L3. The original gel images are presented in Fig. S24B. (C) Morphologies of the Cu(II)-treated A $\beta_{40}$  (top) and A $\beta_{42}$  (bottom) aggregates from (B), monitored by TEM. Scale bars, 200 nm. Conditions were as follows: [A $\beta$ ] = 25  $\mu$ M; [CuCl<sub>2</sub>] = 25  $\mu$ M; [compound] = 50  $\mu$ M; 37  $^\circ$ C; constant agitation.

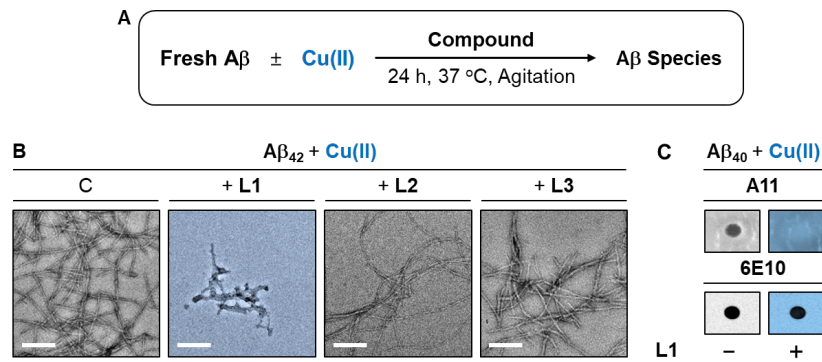

**Fig. S21.** Analysis of the Cu(II)– $A\beta$  samples treated with or without **L1** by TEM or the dot blot assay. (A) Scheme of the inhibition experiments. (B) Morphologies of the resultant  $A\beta_{42}$  aggregates from the inhibition experiments, monitored by TEM. Scale bars, 200 nm. Conditions were as follows: [ $A\beta$ ], 25  $\mu\text{M}$ ; [compound], 50  $\mu\text{M}$ ; 37  $^\circ\text{C}$ ; constant agitation. (C) Dot blots of Cu(II)-added  $A\beta_{40}$  incubated with and without **L1** using an anti-oligomer antibody (A11) and an anti- $A\beta$  antibody (6E10). Conditions were as follows: [ $A\beta_{40}$ ] = 100  $\mu\text{M}$ ; [ $\text{CuCl}_2$ ] = 100  $\mu\text{M}$ ; [compound] = 200  $\mu\text{M}$ ; 37  $^\circ\text{C}$ ; constant agitation.

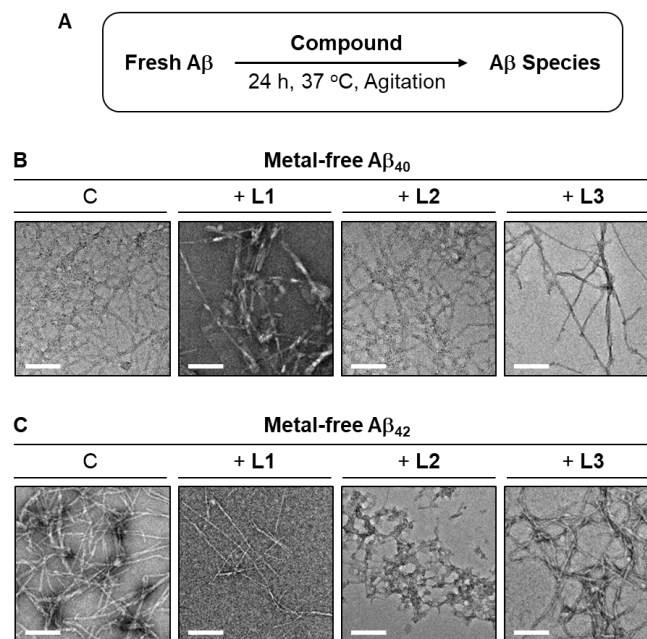

**Fig. S22.** TEM images of the resultant metal-free  $A\beta_{40}$  and  $A\beta_{42}$  aggregates generated with treatment with **L1–L3** from the inhibition experiments. (A) Scheme of the inhibition experiments. (B and C) Morphologies of the resultant  $A\beta_{40}$  and  $A\beta_{42}$  aggregates, monitored by TEM. Scale bars, 200 nm. Conditions were as follows:  $[A\beta] = 25 \mu\text{M}$ ;  $[\text{compound}] = 50 \mu\text{M}$ ;  $37 \text{ }^\circ\text{C}$ ; constant agitation.

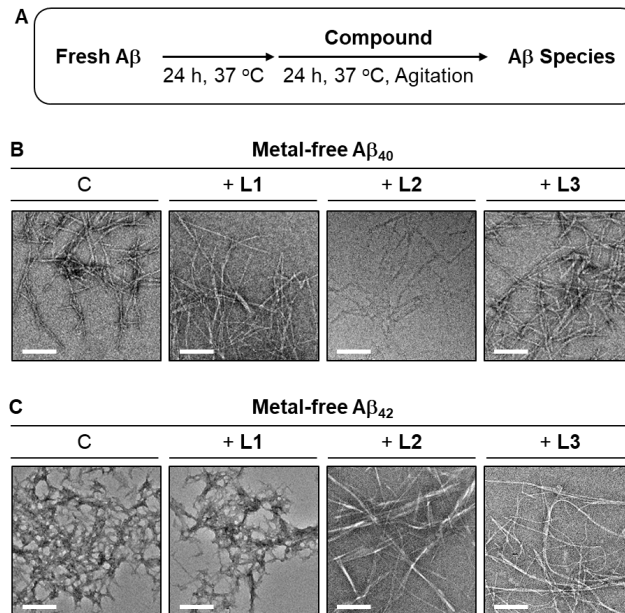

**Fig. S23.** TEM images of the resultant metal-free A $\beta_{40}$  and A $\beta_{42}$  aggregates formed upon incubation with L1–L3 from the disaggregation experiments. (A) Scheme of the disaggregation experiments. (B and C) Morphologies of the resultant A $\beta_{40}$  and A $\beta_{42}$  aggregates, monitored by TEM. Scale bars, 200 nm. Conditions were as follows: [A $\beta$ ] = 25  $\mu\text{M}$ ; [compound] = 50  $\mu\text{M}$ ; 37  $^\circ\text{C}$ ; constant agitation.

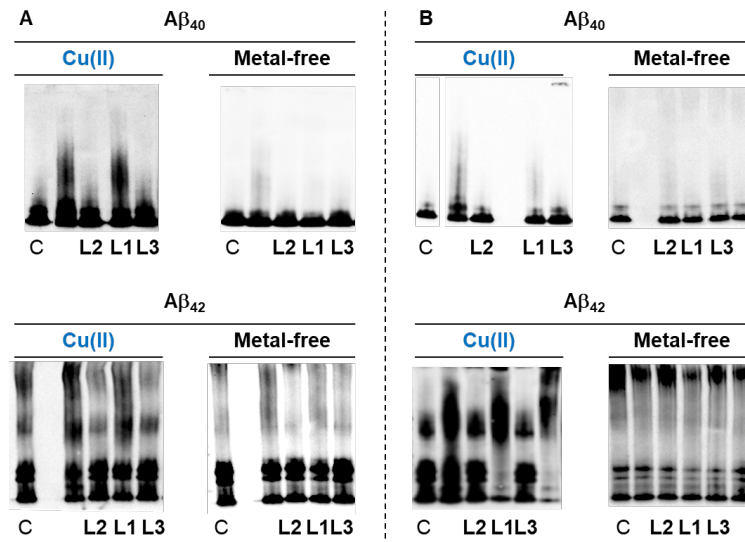

**Fig. S24.** Original gel images from the (A) inhibition (Fig. 4B) and (B) disaggregation (Fig. S20B) experiments.

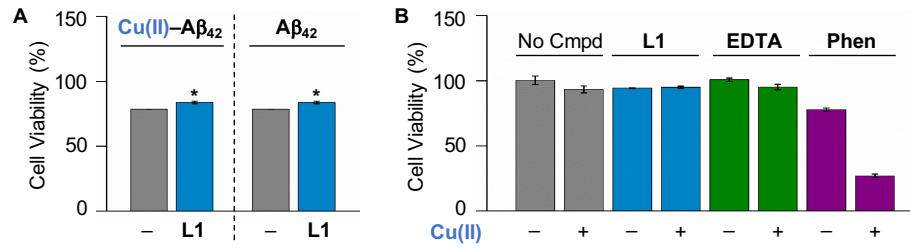

**Fig. S25.** Viability of SH-SY5Y cells treated with A $\beta$ , Cu(II), and compounds. (A) Cytotoxicity of Cu(II)-A $\beta_{42}$  and metal-free A $\beta_{42}$  that were incubated with **L1**. (B) Cytotoxicity of **L1**, **EDTA**, and **phen** in the absence and presence of Cu(II). Cell viability, determined by the MTT assay, was calculated in comparison to that obtained upon treatment with an equivalent amount of DMSO. Conditions were as follows: [A $\beta$ ] = 10  $\mu$ M; [CuCl<sub>2</sub>] = 10  $\mu$ M; [compound] = 10  $\mu$ M. \**P* < 0.05 by Student's *t* test.

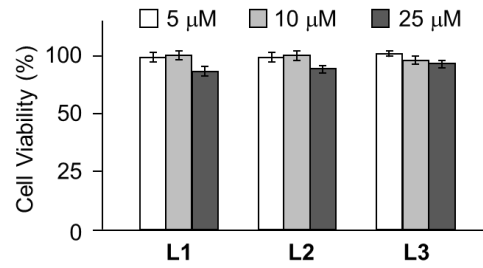

**Fig. S26.** Cytotoxicity of **L1–L3**, determined by the MTT assay. Cell viability was calculated in comparison to that obtained upon treatment with an equivalent amount of DMSO. Error bars represent the standard deviation from three independent experiments.



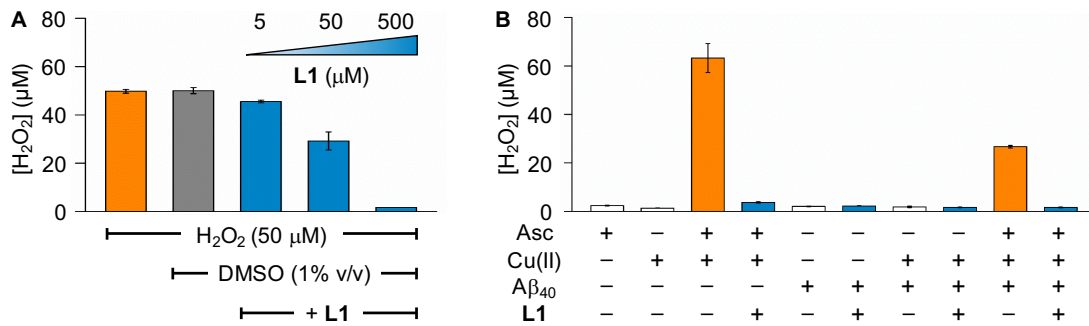

**Fig. S27.** Impact of **L1** on H<sub>2</sub>O<sub>2</sub> or H<sub>2</sub>O<sub>2</sub> generated via Fenton-like reactions of Cu(I/II) or Cu(I/II)-Aβ<sub>40</sub>. (A) Amount of H<sub>2</sub>O<sub>2</sub> with and without treatment of **L1**, measured by an Amplex Red H<sub>2</sub>O<sub>2</sub>/peroxidase assay. Conditions were as follows: [H<sub>2</sub>O<sub>2</sub>] = 50 μM; [**L1**] = 5, 50, and 500 μM (DMSO 1% v/v). (B) Concentration of H<sub>2</sub>O<sub>2</sub> in the samples [*L*-ascorbate only (Asc); Cu(II) only; *L*-ascorbate + Cu(II); *L*-ascorbate + Cu(II) + **L1**; Aβ<sub>40</sub> only; Aβ<sub>40</sub> + **L1**; Cu(II) + Aβ<sub>40</sub>; Cu(II) + Aβ<sub>40</sub> + **L1**; *L*-ascorbate + Cu(II) + Aβ<sub>40</sub>; *L*-ascorbate + Cu(II) + Aβ<sub>40</sub> + **L1**], detected by an Amplex Red H<sub>2</sub>O<sub>2</sub>/peroxidase assay. Conditions were as follows: [Aβ<sub>40</sub>] = 25 μM; [CuCl<sub>2</sub>] = 25 μM; [*L*-ascorbate] = 1 mM; [**L1**] = 50 μM (DMSO 1% v/v).

## References

1. S. Lee *et al.*, Rational design of a structural framework with potential use to develop chemical reagents that target and modulate multiple facets of Alzheimer's disease. *J. Am. Chem. Soc.* **136**, 299–310 (2015).
2. J.-S. Choi, J. J. Braymer, R. P. Nanga, A. Ramamoorthy, M. H. Lim, Design of small molecules that target metal–A $\beta$  species and regulate metal-induced A $\beta$  aggregation and neurotoxicity. *Proc. Natl. Acad. Sci. U. S. A.* **107**, 21990–21995 (2010).
3. J. S. Derrick *et al.*, A redox-active, compact molecule for cross-linking amyloidogenic peptides into nontoxic, off-pathway aggregates: in vitro and in vivo efficacy and molecular mechanisms. *J. Am. Chem. Soc.* **137**, 14785–14797 (2015).
4. L. Di, E. H. Kerns, K. Fan, O. J. McConnell, G. T. Carter, High throughput artificial membrane permeability assay for blood-brain barrier. *Eur. J. Med. Chem.* **38**, 223–232 (2003).
5. A. Avdeef *et al.*, PAMPA—critical factors for better predictions of absorption. *J. Pharm. Sci.* **96**, 2893–2909 (2007).
6. S. S. Hindo *et al.*, Small molecule modulators of copper-induced A $\beta$  aggregation. *J. Am. Chem. Soc.* **131**, 16663–16665 (2009).
7. H. J. Lee *et al.*, Structural and mechanistic insights into development of chemical tools to control individual and inter-related pathological features in Alzheimer's disease. *Chem. Eur. J.* **23**, 2706–2715 (2017).
8. M. W. Beck *et al.*, A rationally designed small molecule for identifying an in vivo link between metal–amyloid- $\beta$  complexes and the pathogenesis of Alzheimer's disease. *Chem. Sci.* **6**, 1879–1886 (2015).
9. S.-J. Hyung *et al.*, Insights into anti-amyloidogenic properties of the green tea extract (–)-epigallocatechin-3-gallate toward metal-associated amyloid- $\beta$  species. *Proc. Natl. Acad. Sci. U. S. A.* **110**, 3743–3748 (2013).
10. A. Micsonai *et al.*, Accurate secondary structure prediction and fold recognition for circular dichroism spectroscopy. *Proc. Natl. Acad. Sci. U. S. A.* **112**, E3095–E3103 (2015).
11. D. D. Mruk, C. Y. Cheng, Enhanced chemiluminescence (ECL) for routine immunoblotting: an inexpensive alternative to commercially available kits. *Spermatogenesis* **1**, 121–122 (2011).
